# Supplementary material for: Synthesis and electrospray mass spectrometry study of Pd(II) complexes of low-rim amino acid substituted calix[4]arenes
Source: Royal Society of Chemistry journal article supplement (doi:10.1039/b103272k), 2001-01-01
Supplement: b103272k_figs1.doc [file b103272k_figs1.doc]

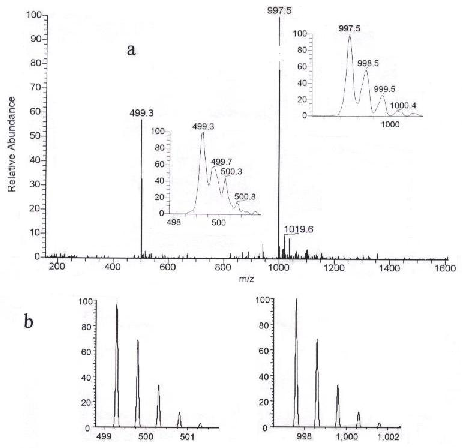


**Figure S1** (a) The ESMS spectra of **La**, the inserted are the measured isotopic distribution patterns (IDPs) of the main peaks. (b) The corresponding simulated IDPs. Found m/z values: 997.5, 998.5, 999.5, 1000.5, 1001.5 for [M+H]+; 499.4, 499.9, 500.4, 500.9, 501.4 for [**La** +2H]2+. Calcd. m/z values: 997.6, 998.6, 999.6, 1000.6, 1001.6 for [M+H]+; 499.3, 499.8, 500.3, 500.8, 501.3 for [**La** +2H]+.
