# Supplementary material for: Synthesis and electrospray mass spectrometry study of Pd(II) complexes of low-rim amino acid substituted calix[4]arenes
Source: Royal Society of Chemistry journal article supplement (doi:10.1039/b103272k), 2001-01-01
Supplement: b103272k_figs2.doc [file b103272k_figs2.doc]

**
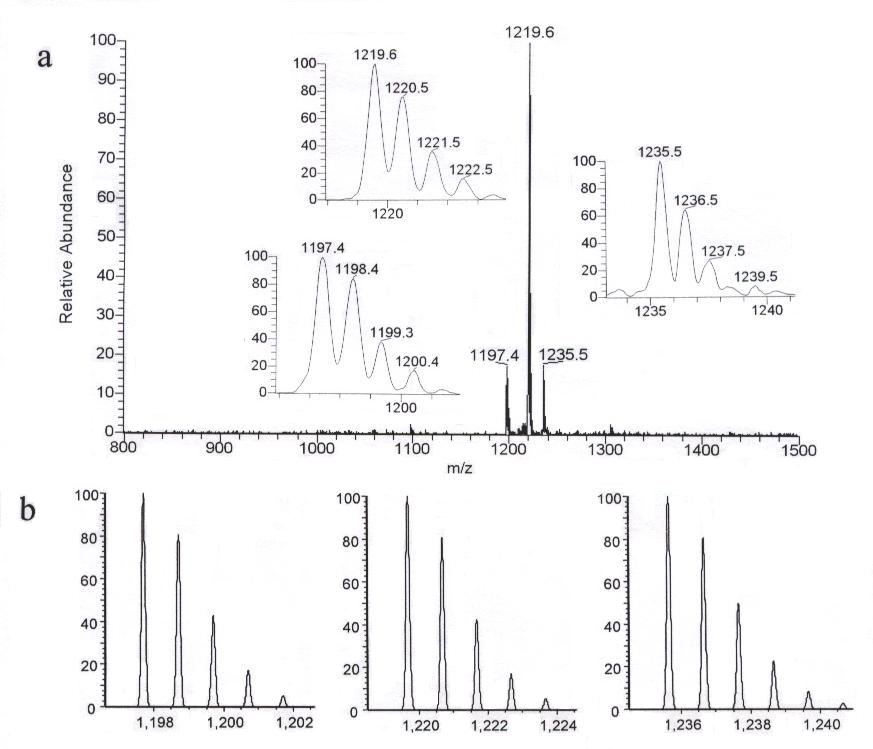
**

**Figure S2** (a) The ESMS spectra of **Lb**, the inserted are the measured IDPs of the main peaks. (b) The corresponding simulated IDPs. Found *m/z* values: 1219.6, 1220.5, 1221.5, 1222.5 for [**Lb**+Na]+; 1197.4,1198.4, 1199.3, 1200.4 for[**Lb**+ H]+; 1235.5, 1236.5, 1237.5, 1238.5 for [**Lb**+K]+. Calcd. *m/z* values: 1219.7, 1220.7, 1221.7, 1222.7 for [**Lb**+Na]+; 1197.7, 1198.7, 1199.6, 1200.7 for [**Lb**+ H]+; 1235.7, 1236.7,1237.7, 1238.7.
