# Supplementary material for: Synthesis and electrospray mass spectrometry study of Pd(II) complexes of low-rim amino acid substituted calix[4]arenes
Source: Royal Society of Chemistry journal article supplement (doi:10.1039/b103272k), 2001-01-01
Supplement: b103272k_figs3.doc [file b103272k_figs3.doc]

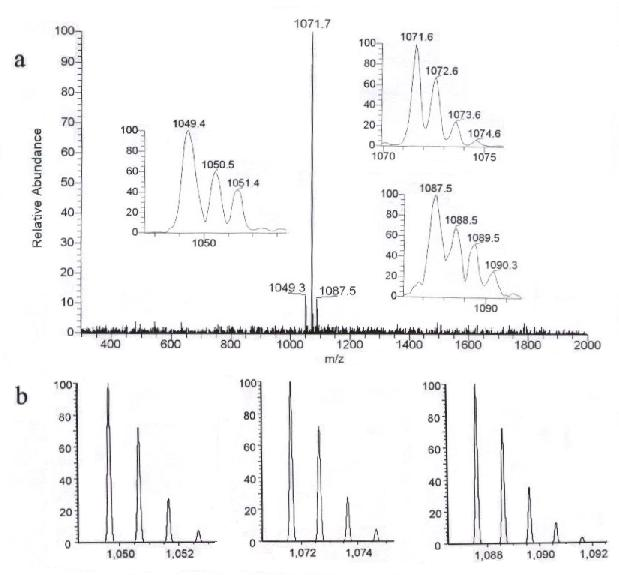


**Figure S3** (a) The ESMS spectra of **Lc**, the inserted are the measured IDPs of the main peaks. (b) The corresponding simulated IDPs. Found *m/z* values: 1071.6, 1072.6, 1073.6, 1074.6 for [**Lc**+Na]+;1049.4,1050.5,1051.4 for[**Lc**+H]+. Calcd. *m/z* values: 1071.6,1072.6, 1073.6,1074.6for [**Lc**+Na]+;1049.6, 1050.6, 1051.6 for[**Lc**+H]+.
