# Supplementary material for: Synthesis and electrospray mass spectrometry study of Pd(II) complexes of low-rim amino acid substituted calix[4]arenes
Source: Royal Society of Chemistry journal article supplement (doi:10.1039/b103272k), 2001-01-01
Supplement: b103272k_figs6.doc [file b103272k_figs6.doc]

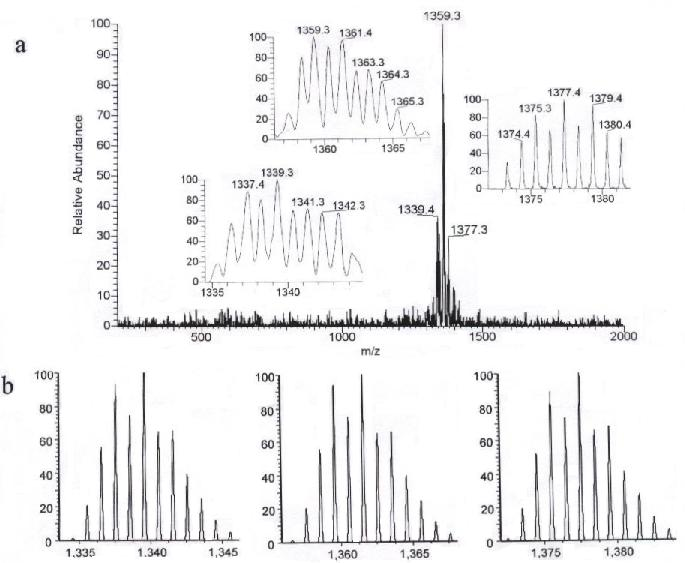


**Figure S6** (a) The ESMS spectrum of complex Pd**Lb**Cl2 obtained after 6 h of reaction at room temperature. The inserted are the measured IDPs of the cluster of peaks with *m/z* around 1339 ([Pd**Lb**Cl]+), 1359 ([Pd**Lb**Cl+Na-H]+) and 1377 ([Pd**Lb**Cl+K-H]+), respectively. (b) The corresponding simulated IDPs. The measured *m/z* values for [Pd**Lb**Cl]+: 1335.3, 1336.3, 1337.4, 1338.3, 1339.3, 1340.3, 1341.3, 1342.3, 1343.2; the calculated *m/z* values: 1335.6, 1336.6, 1337.6, 1338.6, 1339.6, 1340.6, 1341.6, 1342.6, 1343.6. The measured *m/z* values for [Pd**Lb**Cl+Na-H]+: 1357.4, 1358.4, 1359.4, 1360.4, 1361.4, 1362.4, 1363.3, 1364.3, 1365.3, 1366.3; the calculated *m/z* values: 1357.5, 1358.5, 1359.5, 1360.6, 1361.6, 1362.6, 1363.6, 1364.6, 1365.6, 1366.6. The measured *m/z* values for [Pd**Lb**Cl+K-H]+: 1373.4, 1374.4, 1375.3, 1376.4, 1377.4, 1378.4, 1379.4, 1380.4, 1381.4; the calculated *m/z* values: 1373.5, 1374.5, 1375.5, 1376.5, 1377.5, 1378.5, 1379.5, 1380.5, 1381.5.
