# Supplementary material for: Synthesis and electrospray mass spectrometry study of Pd(II) complexes of low-rim amino acid substituted calix[4]arenes
Source: Royal Society of Chemistry journal article supplement (doi:10.1039/b103272k), 2001-01-01
Supplement: b103272k_figs7.doc [file b103272k_figs7.doc]

**Figure S7** The calculated IDPs corresponding to the inserted IDPs in Figure 3.
