# Supplementary material for: Synthesis and electrospray mass spectrometry study of Pd(II) complexes of low-rim amino acid substituted calix[4]arenes
Source: Royal Society of Chemistry journal article supplement (doi:10.1039/b103272k), 2001-01-01
Supplement: b103272k_figs8.doc [file b103272k_figs8.doc]

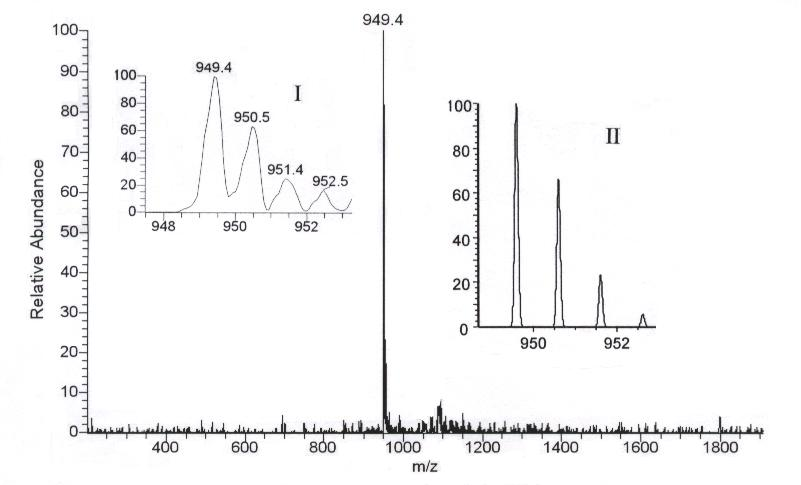


**Figure S8** The ESMS spectrum of compound **B** (refluxed for 2.5 h). The inserted are the measured IDP of the cluster of peaks with *m/z* around 949 (I) and the corresponding calculated IDP of [**Lc**-BOC +2H]+ (II). Found *m/z* values: 949.4, 950.5, 951.4, 952.5. Calcd. *m/z* values: 949.6, 950.6, 951.6, 952.6.
