# Supplementary material for: Synthesis and electrospray mass spectrometry study of Pd(II) complexes of low-rim amino acid substituted calix[4]arenes
Source: Royal Society of Chemistry journal article supplement (doi:10.1039/b103272k), 2001-01-01
Supplement: b103272k_figs9.doc [file b103272k_figs9.doc]

**Figure S9** The calculated IDPs corresponding to the inserted IDPs in Figure 4.
